# Supplementary material
Source: publisher figshare collection journal article supplement (https://frontiersin.figshare.com/ndownloader/files/22384032)
Supplement: Supplementary file 1 [file 22384032]

**Supplemental Data**

**
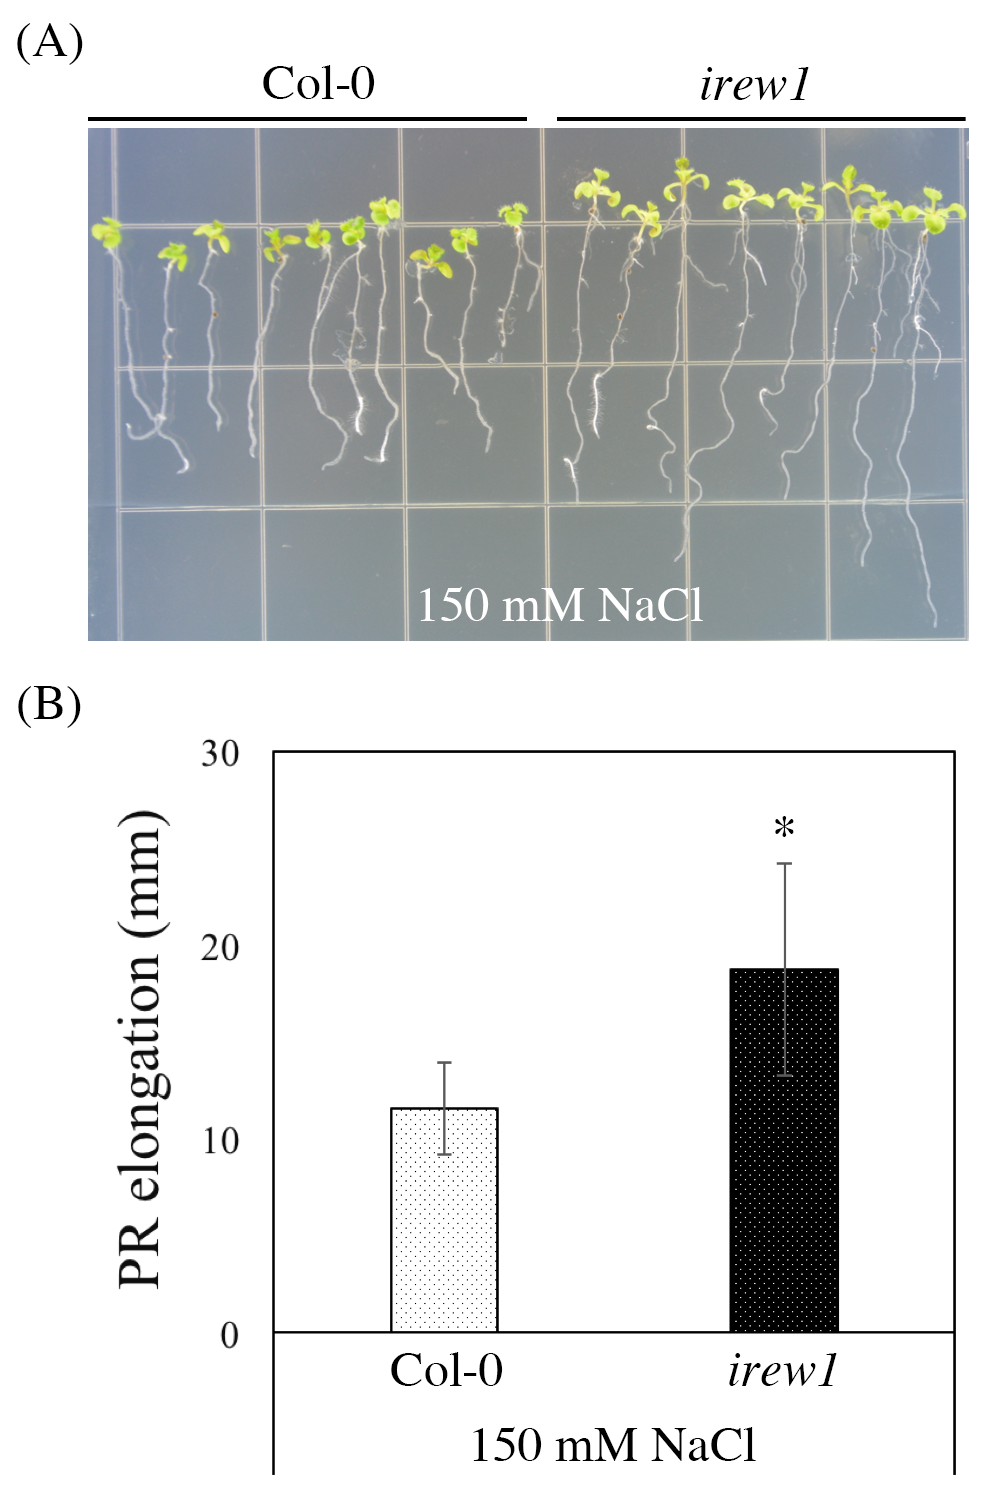
**

**Fig. S1** Root growth of *irew1* and Col-0 under high salinity treatment. Primary root (PR) growth phenotypes (A) and elongation (B) of 5 dag *irew1* and Col-0 seedlings under 150 mM NaCl treatment for 5 days. The values are means, and error bars show ± SD of ten biological replicates from two independent experiments. **p* < 0.05 as determined by a Student’s *t* test.

**
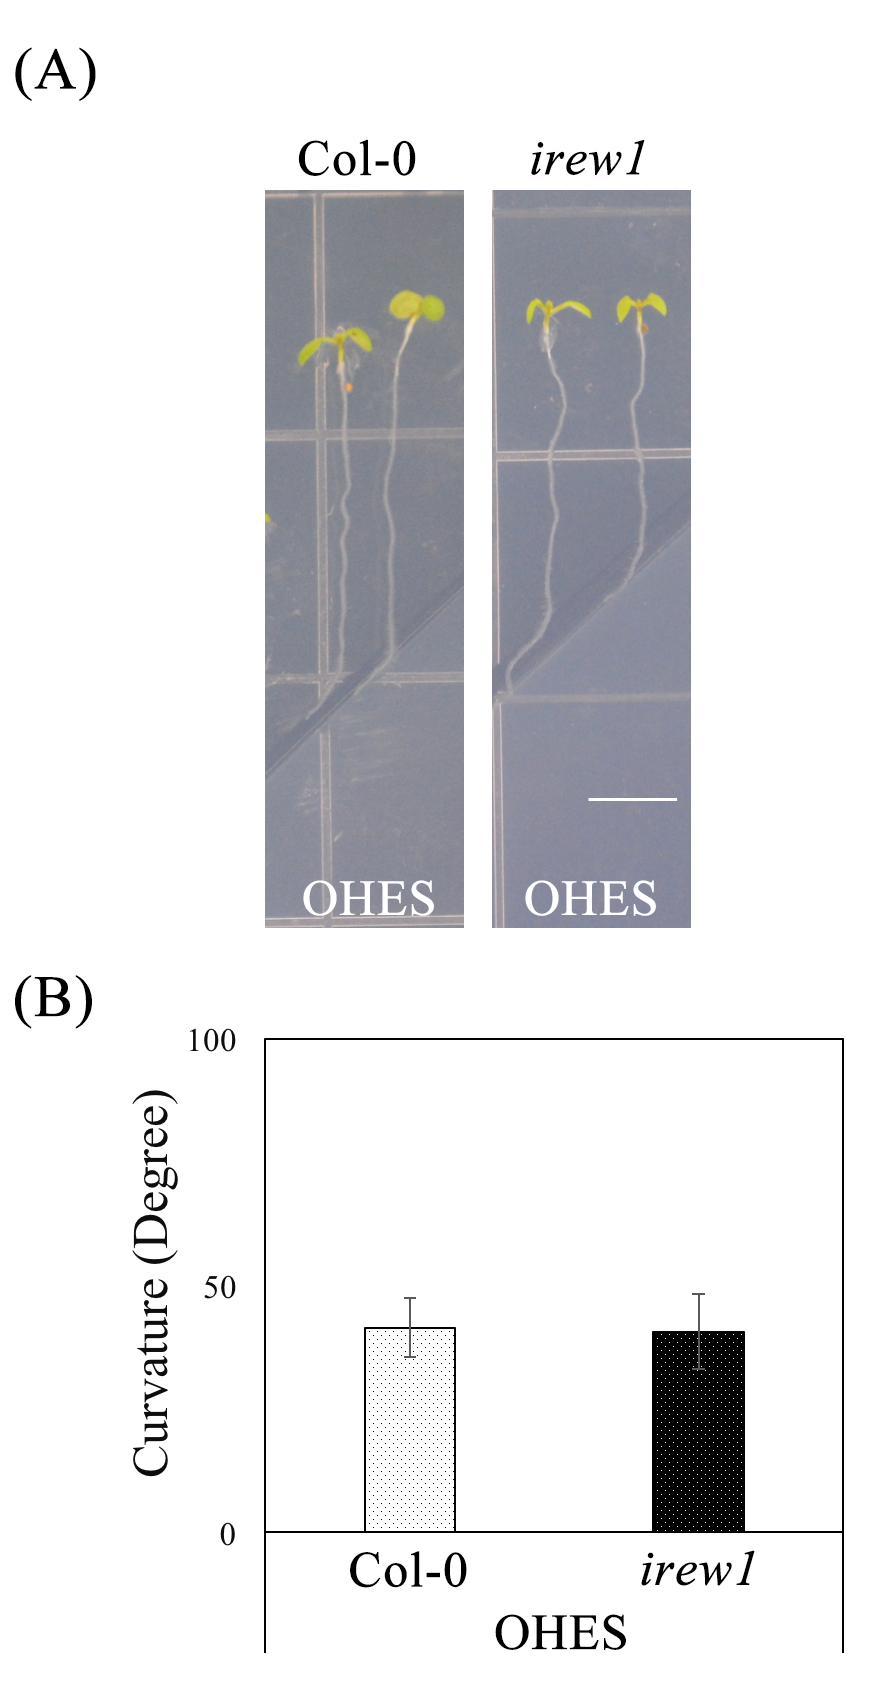
**

**Fig. S2** Hydrotropic responses of *irew1* and Col-0. Hydrotropic response (A) and curvature degree (B) of 5 dag *irew1* and Col-0 seedlings on obliquely oriented hydrotropic experimental system (OHES). The values are means, and error bars show ± SD of twenty biological replicates from two independent experiments. The scale bar indicates 1.0 cm.

**
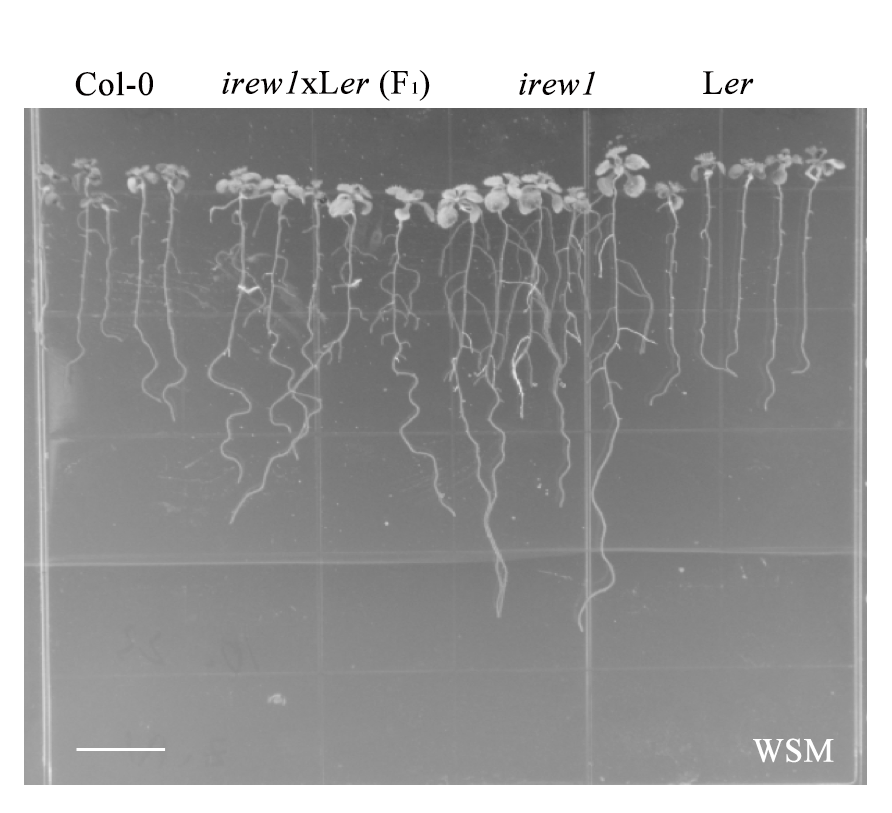
**

**Fig. S3** *irew1* is a semi-dominant mutant. F1 progeny from *irew1* X L*er* cross showed a semi-dominant phenotype under WSM. The scale bar indicates 0.5 cm.

**
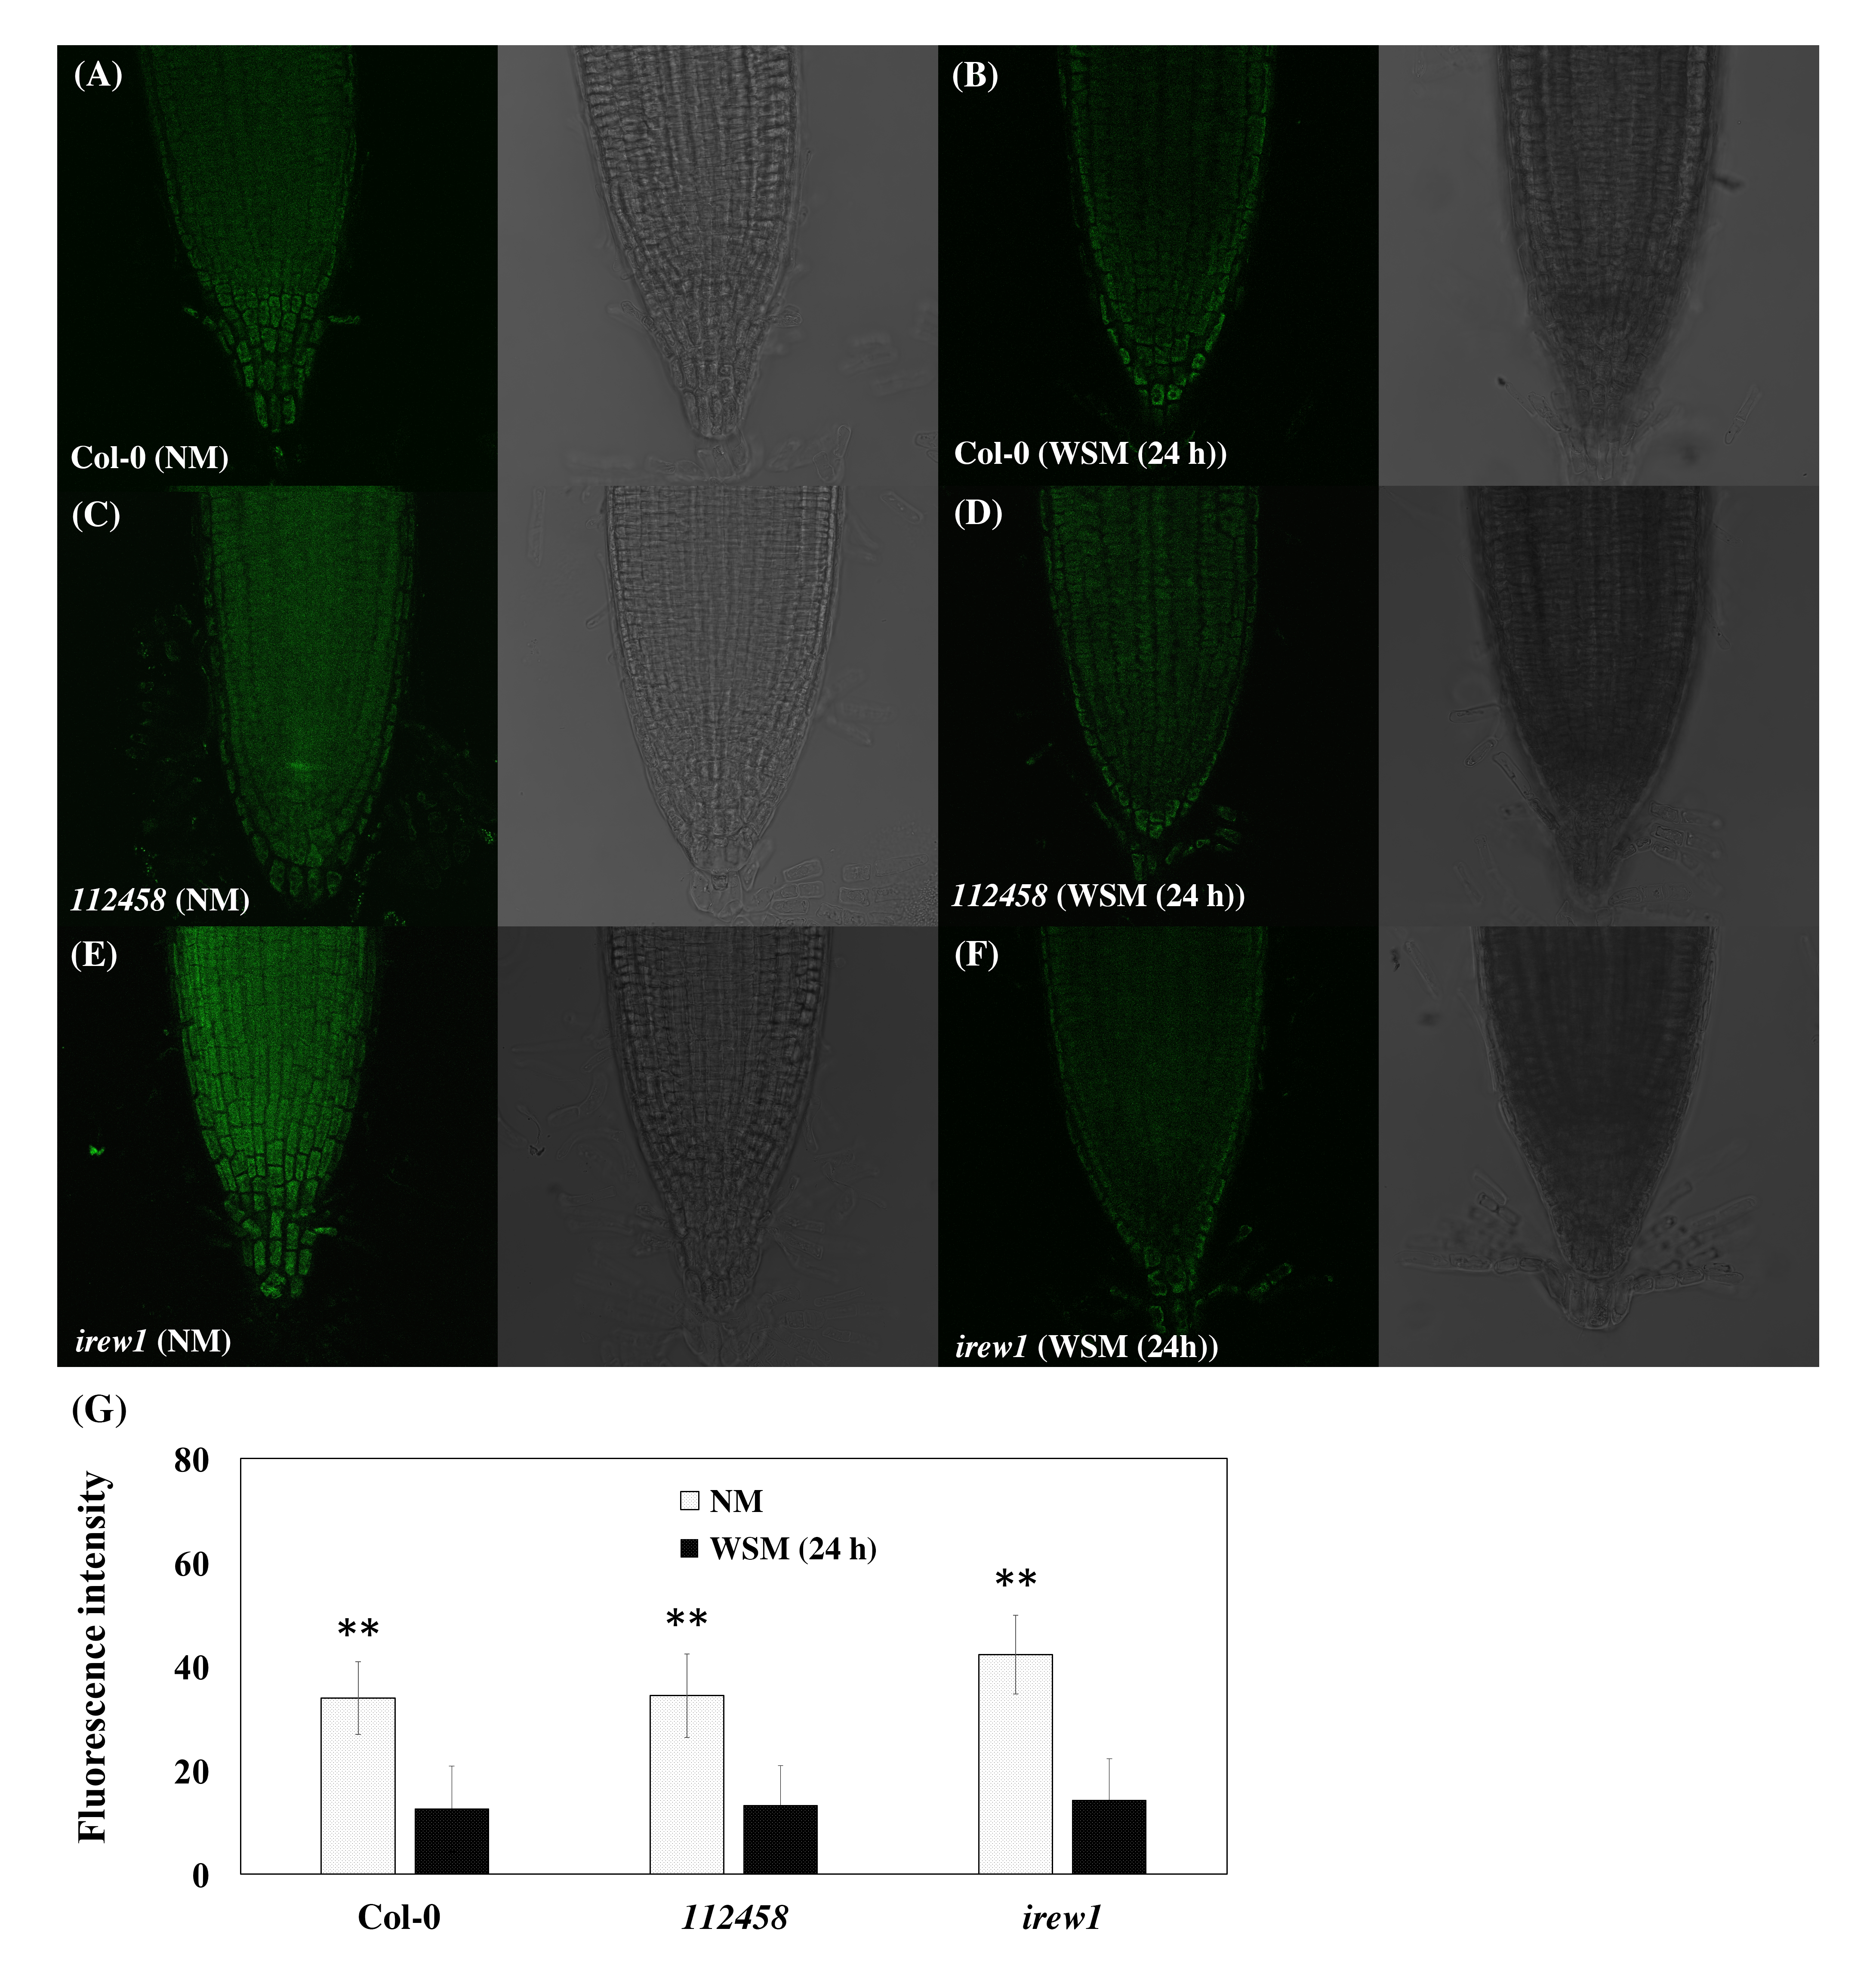
**

**Fig. S4** Distribution of Ca2+ in root of Col-0, *112458* and *irew1* under WSM. Confocal image of Col-0 root incubated in fluo-4/AM solution on NM (A) and WSM (B); Confocal image of *112458* root incubated in fluo-4/AM solution on NM (C) and WSM (D); Confocal image of *irew1* root incubated in fluo-4/AM solution on NM (E) and WHES (F). (G) Quantification of fluorescence intensity of Ca2+ in root of Col-0, *112458* and *irew1* shown in (A-F). The values are means, and error bars show ± SD of six biological replicates from three independent experiments. ***p* < 0.01 as determined by a Student’s *t* test.

**Table S1** List of 912 and 330 Differentially Expressed Genes (DEGs) in roots of Arabidopsis Col-0 wild-type and *irew1* mutant in response to water potential gradients (Col-0-NM vs. Col-0-WSM and *irew1*-NM vs. *irew1*-WSM). Differential gene expression across Col-0 and *irew1* was presumed significant when expression differences reached 1:1048576 ≥ 0.8 (Tarazona et al., 2011).

**Table S2** Candidate genes for *irew1* in Chromosome I from 27.3 Mb to 31.3 Mb.

**Table S3 Primers used in the study.**

| Name | Sequence |
| --- | --- |
| *COR47*, (AT1G20440) Forward | AGCTTCACCGATCCAACAGCT |
| *COR47*, (AT1G20440) Reverse | TTCCTCGGGATGGTCATGCT |
| *GASA1*, (AT1G75750) Forward | TCTCCAACTCGTCCAGGCTGAT |
| *GASA1*, (AT1G75750) Reverse | ACTGGCACTTGTCGTAGTTTCCG |
| *ATHB7*, (AT2G46680) Forward | GAAATCCAAGCAGCTCGAGACT |
| *ATHB7*, (AT2G46680) Reverse | CCCTCGAGGATTGTGTAGTTGTTGCTG |
| *AZF2*, (AT3G19580) Forward | CGCCGTTTTCATTGAGCCGT |
| *AZF2*, (AT3G19580) Reverse | TTCTTTGATTCTGGCGGCGG |
| *ADC2*, (AT4G34710) Forward | TTGTGTGTGACCGGAGCTCA |
| *ADC2*, (AT4G34710) Reverse | TCCACGCATCACAGCAGCAT |
| *RAB18* Forward  *RAB18* Reverse  *RD26* Forward  *RD26* Reverse  *RD29B* Forward  *RD29B* Reverse  *Actin2* Forward  *Actin2* Reverse | TTGTAACGCAGTCGCATT  GATGCTCATTACACACTCATG  AGGTCTTAATCCAATTCCAG  GAGTTCTGCTGCCGATTC  AAGAACGTCGTTGCCTCA  GCCCGTAAGCAGTAACAG  CCCGCTATGTATGTCGC  AAGGTCAAGACGGAGGAT |
